# Supplementary material
Source: PubMed Central journal article supplement (PMC2930740)
Supplement: supp_M109.078667_Supplementary.v2.Figures.pdf [file supp_M109.078667_Supplementary.v2.Figures.pdf]

Supplementary Material for the Submission “Identification of the Citrate-Binding Site of Human ATP-Citrate Lyase Using X-ray Crystallography” by Tianjun Sun, Koto Hayakawa, Katherine S. Bateman, Marie E. Fraser.

**Supplementary Table S1.** Residues of human ATP-citrate lyase identified by peptide mass spectrometry.

| Experimental relative molecular weight (Da) | Calculated relative molecular weight (Da) | Sequence, including the identities of the two residues bordering the detected peptide | Residue range in hACL |
|---------------------------------------------|-------------------------------------------|---------------------------------------------------------------------------------------|-----------------------|
| Peptides from the 50 kDa band               |                                           |                                                                                       |                       |
| 1059.5214                                   | 1059.4985                                 | R.VTPDTDWAR.L                                                                         | 34 - 42               |
| 2596.4763                                   | 2596.4741                                 | R.LLQDHPWLLSQNLVVKPDQLIK.R                                                            | 43 - 64               |
| 2256.9955                                   | 2257.0288                                 | R.EGDYVLFHHEGGVDVGDVDAK.A                                                             | 128 - 148             |
| 1416.6961                                   | 1416.6826                                 | K.WGDIEFPPPFGR.E                                                                      | 233 - 244             |
| 1696.7515                                   | 1696.7831                                 | R.EAYPEEA YIADLDAK.S                                                                  | 245 - 259             |
| 1949.0752                                   | 1949.0986                                 | K.ILIIGGSIANFTNVAATFK.G                                                               | 337 - 355             |
| 1929.9719                                   | 1929.9949                                 | R.DYQGPLKEHEVTIFVR.R                                                                  | 363 - 378             |
| 1128.6050                                   | 1128.5928                                 | K.EHEVTIFVR.R                                                                         | 370 - 378             |
| 1245.5997                                   | 1245.6214                                 | R.RGGPNYQEGLR.V                                                                       | 379 - 389             |
| 1089.5353                                   | 1089.5203                                 | R.GGPNYQEGLR.V                                                                        | 380 - 389             |
| 1992.9752                                   | 1993.0415                                 | K.AKPAMPQDSVPSRSLQGK.S                                                                | 470 - 488             |
| Peptides from the 35 kDa band               |                                           |                                                                                       |                       |
| 1060.5544                                   | 1060.5488                                 | K.AIVWGMQTR.A                                                                         | 499 - 507             |
| 1076.5366                                   | 1076.5437                                 | K.AIVWGMQTR.A Oxidation of M                                                          | 499 - 507             |
| 1878.8405                                   | 1878.8458                                 | R.DEPSVAAMVYPFTGDHK.Q Oxidation of M                                                  | 522 - 538             |
| 1092.5622                                   | 1092.5505                                 | K.QKFYWGHEK.E                                                                         | 539 - 546             |
| 836.3939                                    | 836.3970                                  | K.FYWGHEK.E                                                                           | 541 - 546             |
| 1736.9589                                   | 1736.9573                                 | R.KHPEVDVLINFASLR.S                                                                   | 562 - 576             |
| 1608.8706                                   | 1608.8624                                 | K.HPEVDVLINFASLR.S                                                                    | 563 - 576             |
| 1895.8115                                   | 1895.8029                                 | R.SAYDSTMETMNYAQIR.T Oxidation of M                                                   | 577 - 592             |
| 1911.7670                                   | 1911.7979                                 | R.SAYDSTMETMNYAQIR.T Oxidation of two M's                                             | 577 - 592             |
| 1566.8956                                   | 1566.8981                                 | R.TIAIIAEGIPEALTR.K                                                                   | 593 - 607             |
| 1366.7288                                   | 1366.7357                                 | K.LYRPGSVAYVSR.S                                                                      | 651 - 662             |
| 1506.7124                                   | 1506.7096                                 | R.SGGMSNELNNIISR.T Oxidation of M                                                     | 663 - 676             |
| 2928.3391                                   | 2928.3713                                 | R.TTDGVYEGVAIGGDRYPGSTFMDHVLRL.Y Oxidation of M                                       | 677 - 703             |
| 1437.6672                                   | 1437.6711                                 | R.YPGSTFMDHVLRL.Y Oxidation of M                                                      | 692 - 703             |

**Supplementary Figure S1.** 9% SDS-PAGE gels showing the presence of two polypeptide chains in crystals of truncated human ATP-citrate lyase. Lane 1 contains the molecular weight markers: 200, 116, 97, 66 and 45 kDa. Lane 2 contains human ATP-citrate lyase. Lane 3 contains human ATP-citrate lyase incubated overnight with chymotrypsin. Lane 4 contains dissolved crystals.

**Supplementary Figure S2.** Sequence alignment of *E. coli* and pig GTP-specific succinyl-CoA synthetase with the truncated human ATP-citrate lyase, based on their structures. Only the residues of *E. coli* or pig GTP-specific succinyl-CoA synthetase whose C $\alpha$  atoms superpose within 2.5 Å of the C $\alpha$  atoms of ATP-citrate lyase are included. Residues of the *E. coli* enzyme are listed above the sequence of ATP-citrate lyase and residues of pig GTP-specific succinyl-CoA synthetase are listed below. Vertical lines denote identical residues. A. Alignment of residues of domains 1 and 2 (chain A or the  $\alpha$ -subunit in succinyl-CoA synthetase). The five loops that may be involved in binding CoA are underlined. B. Alignment of residues of domains 3-5 (chain B or the  $\beta$ -subunit in succinyl-CoA synthetase).

Figure S1

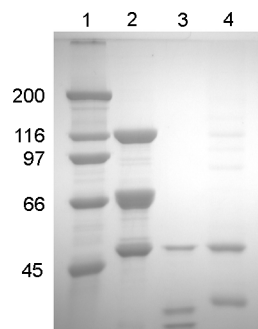

Figure S2A

```

B1 MNLHEYQAKQLFARY B15   B21 VGYAC B25
      |   |   |
1  MSAKAISEQTGKELLYKFICTTSAIQNRFKYARVTPDPTDWARLLQDHPWLLSQ
      |   |   |
B1 MNLQEYQSKKLMSDN B15   B21 RFFVAD B26

B42 PWVVKCQVHAGGRG   GVKV B62EDIR B70
      |||   |   |
54  NLVVKPDQLIKRRGKLGVLGVNLTLDGVKSWLKPRLGQEATVGKATG
      |   |   |   |   |   |   |
B42 EIVLKAQILAGGRG   GGVHL   DPEVVGQLAK B81

      B95 QILVEAATDI   KELYLGAVV   RRVVFMASTEGG B130   IHKVAL B149
            |   |   |           |   |           |||
101  FLKNFLIEPFVPHSQAEFFYVCIYATREGDYVLFHHEGGVDVGDVDAKAQKLLVGVDEKLNPEDIKKHLLVHAPEDK
            |   |   |   |   |   |   |   |   |   |
B99  KVNKVMVAEALDI   RETYLAILM   NGPVLVGSPOGG B137   IFKEQI   GIKDS B165

      B176 QFTKIFMGLATIFLERDLALIEINPLVIT   DLICLDGKLGAD B219
            |   |           |||||   |   |
180  KEILASFISGLFNFYEDLYFTYLEINPLVVTKDGVVYVLDLAAKVDATADYICKVKWGDIEFPPPFGR
            |   |   |   |   |   |   |   |   |   |
B181  QNQAADQIKKLYNLFLKIDATQVEVNPFGF   QVVCFDAKINFD B226

      B238 EDPREAQAA   B250 LNYVALD   NIGCMVN   LAMGTMDIVKLH B279
            |   |   |           |   |           |   |
245  EAYPEEAYIADLDAKSGASLKLTLNPKGRIWTMVAGGGASVVYSDTICDLGGVNE
            |   |   |   |   |   |   |   |   |   |
B244  ENAPIENEAAKYD B257 LKYIGL   NIACFVN   AGLAMATCDIIFL B285

B283 PANFLDV B289           B312 KAVLVNIF B319
      |   |
301  LANYGEYSGAPSEQQTYDYAKTILSLMTREKHPDGKILIIIGGSIAN
      |   |   |   |
B290 PANFLDL GGVKES VYQAFKLL B312   B319 EAILVN B324

      B336 VAEVG B340   VPVVVRLE B350           B367 NIIA B370   DAAQQVVA B383
            |   |           |   |           |
347  FTNVAATFKGIVRAIRDYQGPLKEHEVTIFVRRGGPNYQEGLRVMGEVGKTTGIPIHVFGTETHMTAIVGMALGHRPIP 425
            |   |   |   |   |   |   |   |   |
B329  IVNCAIIANGITKACRELE   B350 VPLVVRLEGTNVHEAQNIL B368           B381 LEDAAK B386

```

Figure S2B

```

      A3 LIDKNTKVICG   GTFHSEQAIAYG   A33 KMVGGVTP   GTH A47
      |   |   |   |   |   |   |   |   |   |
487 GKSTTLFSRHTKAIVWGMQTRAVOGMLDFDYVCSRDEPSVAAMVYPFTGDHKQKQFYWGHEILI 550
      |   |   |   |   |   |   |   |   |   |
      A12 VDKNTKVICQG   GTFHSQOALEYG   A41 NLVGGTTP   A48

A51 PVFNTVREAVAATG ATASVIYVPPAPFCCKDSILEAIDA A87
   ||| | | | | | | | | | | | | | | | | | | | |
551 PVFKNMADAMRKHPEVDVLINFASLRSAYDSTMETMNYAQ 590
   ||| | | | | | | | | | | | | | | | | | | | |
A59 PVFN   EAKEQT GATASVIYVPPPFAAAAINEAIDA A95

A89 IKLIITITEGIPTLDMLTVKVKLDEAGVRMIGPNCPGVITPGECKI A134
   | | | | | | | | | | | | | | | | | | | | | | |
591 IRTIAIIAEGIPEALTRKLIKKADQKGVTIIGPATVGGIKPGCFKI 636
      | | | | | | | | | | | | | | | | | | | | | | |
A97 VPLVVCITEGIPQQDMVRVKHRLLRQ A123
      | | | | | | | | | | | | | | | | | | | | | | |
      A125 TRLIGNCPGVINPGECKI A143

      A144 PGKVGIVSRSGTLTYEAVKQTTDY A167
      | | | | | | | | | | | | | | | | | | | | | | |
637 GNTGGMLDNILASKLYRPGSVAYVSRSGGMSNELNNIISRTT 678
      | | | | | | | | | | | | | | | | | | | | | | |
      A153 KGRIGIVSRSGTLTYEAVHQTTQV A176

A169 FGQSTCVGIGGDPIPGSNFIDILEMFEKDPQTEAIVMIGEIGGSAAE A215
      | | | | | | | | | | | | | | | | | | | | | | |
679 DGVYEGVAIGGDRYPGSTFMDHVLRYQDTPGVKMIVVLGEIGGTEEYKICRGIKEG 734
      | | | | | | | | | | | | | | | | | | | | | | |
A178 LGQSLCVGIGGDPFNGTDFTDCLEIFLNDPATEGIILIGEIGGNAEEN A225

A224 HVTKPVVGYIAGVT A237   A256 GTADEKFA A263
      ||| | | | | | | | | | | | | | | | | | | | |
735 RLTKPIVCWCIGTCATMFSSEVQFGHAGACANQASETAVAKNQALKEA 782
      ||| | | | | | | | | | | | | | | | | | | | |
A240   KPVVSFIAGLT A250   A270   GAKEKIT A276

A269 GVKTV A281 GEALKTV A286
      || | | | | | | | | | | | | | | | | | | | | |
783 GVFVPRSFDELGEIIQSVYEDLVANGVIVPAQEVPPPT 820
      || | | | | | | | | | | | | | | | | | | | | |
A282 GVVVS A294 TTIYKE A299

```
